1 **Geography, not host identity, shapes bacterial community in reindeer lichens**

2 **Marta Alonso-García<sup>1,2,\*</sup> and Juan Carlos Villarreal A.<sup>1,2,3</sup>**

3 <sup>1</sup> Département de Biologie, Université Laval, Québec, G1V 0A6, Canada.

4 <sup>2</sup> Institut de Biologie Intégrative et des Systèmes (IBIS), Université Laval, Québec, G1V  
5 0A6, Canada.

6 <sup>3</sup> Royal Botanic Garden, 20A Inverleith Row, Edinburgh EH3 5LR.

7 \* For correspondence. E-mail [marta.alonso-garcia.1@ulaval.ca](mailto:marta.alonso-garcia.1@ulaval.ca)

8 *Factors driving bacteria in the boreal forest*

9

1 **Background and Aims** Tremendous progress have been recently achieved in host-  
2 microbe research, however, there is still a surprising lack of knowledge in many taxa.  
3 Despite its dominance and crucial role in boreal forest, reindeer lichens have until now  
4 received little attention. We characterize, for the first time, the bacterial community of  
5 four species of reindeer lichens from Eastern North America's boreal forests. We  
6 analysed the effect of two factors (host-identity and geography) in the bacterial  
7 community composition, we verified the presence of a common core bacteriota and  
8 identified the most abundant core taxa.

9 **Methods** Morphological and molecular lichen species delimitation was performed based  
10 on the ITS region. The bacterial community of around 200 lichen samples was  
11 characterised using the 16S rRNA gene.

12 **Key Results** Our results showed that host-lichen identity does not determine bacterial  
13 community composition in reindeer lichens, but we confirmed the influence of geography  
14 in shaping the diversity and abundance of bacteria associated to the species *Cladonia*  
15 *stellaris* from lichen woodlands. We also revealed that reindeer lichens share a reduced  
16 common core bacteriota composed exclusively by Proteobacteria.

17 **Conclusions** The bacterial community in reindeer lichens is not host-selective. Northern  
18 lichen woodlands exhibit a significant higher diversity and abundance of bacteria  
19 associated to *Cladonia stellaris*. Nevertheless, the specific role of those bacteria as well  
20 as the process of host colonization remains to be determined. Elucidating these two  
21 aspects would be key to have a better understanding of the whole boreal ecosystems. The  
22 reduced and not diverse core bacteriota of reindeer lichens might be due to the larger size

1 of our study area. The presence of the species *Methylorosula polaris* in the core  
2 bacteriota is evident and might have a particular importance for reindeer lichens.

3 **Key words:** bacteria, *Cladonia stellaris*, geography, host identity, ITS region, latitude,  
4 microorganisms, multi-model species, Quebec, reindeer lichens, species delimitation,  
5 symbiotic interactions, thallus morphology.

6

1 INTRODUCTION

2 Genomic-based microbiome research has become a popular topic over the last decade and  
3 has generated a great interest not only for the scientific community, but also for the  
4 general public. Microbiome research started in human medical studies (Turnbaugh *et al.*,  
5 2007; Lloyd-Price *et al.*, 2017). Nowadays, this field of knowledge is applied to  
6 numerous domains (e.g.: vertebrate (Youngblut *et al.*, 2019), insect (Douglas, 2018),  
7 plants (Trivedi *et al.*, 2020), phages (Federici *et al.*, 2020), soil (Delgado-Baquerizo *et*  
8 *al.*, 2018)). As a result of this rapid interest on microbiome research, Berg *et al.* suggested  
9 rules and a baseline for microbiome studies, clearly delimitating the terms microbiota and  
10 microbiome (Berg *et al.*, 2020). The latter contains the microbiota (community of  
11 microorganisms) and their structural elements, metabolites and the surrounding  
12 environmental conditions (Berg *et al.*, 2020). Microbiome research, therefore, focuses on  
13 the interactions of microbes within a specified environment or host (Cullen *et al.*, 2020).  
14 One of the most pressing questions in microbiome research is, in fact, whether exists host  
15 specificity of the microbial community. Specificity can be considered as an interaction  
16 between microorganisms and host in which absolute exclusiveness is expressed (Bubrick  
17 *et al.*, 1985). It should not be mistaken with host-selectivity which describes a situation  
18 where microorganisms and host interact preferentially with one another (Bubrick *et al.*,  
19 1985). Microorganisms display various levels of host specificity, infecting a wide range  
20 of hosts (Rahme *et al.*, 2000; Chappell and Rausher, 2016) or having strict host  
21 selectivity as happened in several living being (e.g., sponges (Reveillaud *et al.*, 2014),  
22 hornworts (Bouchard *et al.*, 2020), cetacean (Denison *et al.*, 2020), humans (Pan *et al.*,  
23 2014)). Despite the impact of host identity shaping the structure and composition of

1 microbial community, many other biotic or abiotic factors can determine the microbiota.  
2 Among the abiotic factors, geography and environmental conditions are probably the  
3 best studied (Rothschild *et al.*, 2018; Zheng and Gong, 2019; Sepulveda and Moeller,  
4 2020). Regarding host-related factors, physiology (Reveillaud *et al.*, 2014; Denison *et al.*,  
5 2020), morphology (Pearce *et al.*, 2017; Morrissey *et al.*, 2019) or genetic (Wagner *et al.*,  
6 2016) are those who have, so far, received more attention. Random colonization and  
7 microbial interactions (Hassani *et al.*, 2018) also contribute to community structure. In  
8 addition, these driving factors can interact together to determine the microbiome (Agler *et*  
9 *al.*, 2016), and their influence can vary depending on the hosts, or the environmental  
10 conditions (Schlechter *et al.*, 2019). Within the same host, each group of microorganisms  
11 may be affected by a different factor (Cardinale, Grube, *et al.*, 2012), or eventually, host-  
12 individual variation in microbiome composition occurs, including individuals harboring  
13 specific taxa (Ley *et al.*, 2008) that result from factors such as diet, environment, season  
14 and host physiology.

15 Another key aspect to considered in microbiome research is the prevalence and  
16 frequency of microorganisms in the host, namely, the core microbiome. The core  
17 microbiome was defined as a group of microbial taxa that occur with hosts above a  
18 particular occupancy frequency threshold (Risely, 2020), often between 30% (Ainsworth  
19 *et al.*, 2015) and 95% (Huse *et al.*, 2012) (common core). The major motivation for  
20 identifying a universal common core is to find a component of the microbiome that, due  
21 to the higher prevalence, may have a particular positive effect on the host. For example,  
22 Lee et al. detected a maintained core microbiome across jellyfish life stages which might  
23 contribute to their evolutionary success (Lee *et al.*, 2018). Ainsworth et al. suggested that

1 symbiotic core bacteria found around the endosymbiotic dinoflagellates fulfil a role in the  
2 physiology and energy requirements of coral hosts (Ainsworth *et al.*, 2015). Those  
3 microbe-host symbiotic interactions have been long time studied (McFall-Ngai, 2008;  
4 Relman, 2008). Nonetheless, there are still substantial knowledge gaps in understanding  
5 the function of a core microbiome, the interactions with the host and the environment. It  
6 is universally recognized that most organisms form a symbiotic assemblage of organisms  
7 working together, otherwise known as the holobiont. The introduction of the term  
8 holobiont (Margulis, 1991) favoured the studies and promoted a holistic view on  
9 symbiotic interactions where several species are considered (Vandenkoornhuyse *et al.*,  
10 2015; Faure *et al.*, 2018; Hassani *et al.*, 2018; Simon *et al.*, 2019). Among non-model  
11 organisms, lichens are the symbiotic organism “par excellence”, because of a partnership  
12 between fungi (one-several species), green algae, cyanobacteria and numerous bacteria  
13 in a multi-species symbiosis (Aschenbrenner *et al.*, 2016; Lavoie *et al.*, 2020). While the  
14 interactions between algae/cyanobacteria have been intensively studied, the role of  
15 bacteria in the symbiosis is still in its infancy (Grube *et al.*, 2015). Genomic exploration  
16 of lichen associated microbes has revealed an unexpected diversity of bacteria, the  
17 majority belonging to Alphaproteobacteria (Cardinale *et al.*, 2008; Grube and Berg, 2009;  
18 Hodkinson and Lutzoni, 2009; Bates *et al.*, 2011; Printzen *et al.*, 2012). Lichen bacteriota  
19 contribute to essential functions of host (nutrient supply, resistance against biotic and  
20 abiotic factors, growth support, detoxification of metabolites or provision of vitamin B<sub>12</sub>)  
21 (Grube *et al.*, 2015) and, can be determine by different factors such as host-identity  
22 (Bates *et al.*, 2011; Sierra *et al.*, 2020), photoautotrophic symbiont (Hodkinson *et al.*,  
23 2012), thallus conditions (Mushegian *et al.*, 2011; Cardinale, Steinová, *et al.*, 2012; Noh

1 *et al.*, 2020) and growth form (Park *et al.*, 2016), substrate type (Park *et al.*, 2016),  
2 habitat (Cardinale, Grube, *et al.*, 2012), or geography (Hodkinson and Lutzoni, 2009;  
3 Aschenbrenner *et al.*, 2014). To date, lichen microbiomes studies have been mainly  
4 carried out in *Lobaria pulmonaria* (Cardinale, Grube, *et al.*, 2012; Aschenbrenner *et al.*,  
5 2014), *Cetraria acuelata* (Printzen *et al.*, 2012), *Cladonia arbuscula* (Cardinale *et al.*,  
6 2008) or *C. squamosa* (Noh *et al.*, 2020). However, there is still a large and unexplored  
7 microbial diversity in other groups of lichens, such as those from northern ecosystems.

8         The boreal forest is the largest biome of North America. It covers 60% of the  
9 Canadian territory (Roi, 2018), extending across the continent from Newfoundland to  
10 Alaska. It stores up to 20% of global soil organic carbon (C) (Jobbágy and Jackson, 2000;  
11 Tarnocai *et al.*, 2009), houses a significant number of endangered species, and is likewise  
12 crucial for indigenous human populations that have lived there for millennia (ACIA  
13 *Impacts of a Warming Arctic* 2004; Larsen, 2014). Reindeer lichens (Ahti, 1961) are  
14 terricolous lichens that have adapted better than almost all other lichens to boreal forest  
15 (Athukorala *et al.*, 2016). Species such as *Cladonia mitis*, *C. rangiferina*, *C. stellaris* and  
16 *C. stygia* have become essential components of those ecosystems and, in winter, they  
17 represent the most important food source for reindeer (*Rangifer tarandus*) and caribou (*R.*  
18 *tarandus caribou*) (Skogland, 1984; Svihus and Holand, 2000; Thompson *et al.*, 2015). In  
19 addition, they contain about 20% of the total lichen woodland (LW) biomass and can  
20 contribute up to 97% of ground cover (Auclair and Rencz, 1982; Morneau and Payette,  
21 1989; Shaver and Chapin, 1991). Within the boreal biome, lichens are particularly  
22 dominant in LWs, a belt between the closed-canopy boreal forest to the south, and the  
23 forest tundra to the north, mostly above the 50 parallel (Payette, 1992; Johnson and

1 Miyanishi, 1999). In Eastern North America, a remnant of LW is located 500 km south of  
2 its usual distribution range, in the *Parcs des Grands-Jardins* (PNGJ) (Jasinski and  
3 Payette, 2005).

4         Based on the importance of lichens in northern ecosystems as well as their utility  
5 as multi-model species to study symbiosis relationships, here we investigate the  
6 bacteriota of four lichen species to elucidate the host-microbe interactions in the boreal  
7 forest. More specifically, we (i) test host-selectivity of the bacterial microbiota associated  
8 to reindeer lichens, (ii) asses the influence of geography in composition and structure of  
9 the bacterial community of *Cladonia stellaris* from LWs and (iii) verifier the presence of  
10 a common core bacteriota in reindeer lichens. To achieve our goals, we used four lichen  
11 species (*C. miti*, *C. rangiferina*, *C. stellaris* and *C. stygia*). Bacterial host-selectivity was  
12 studied based on morphological and molecular species delimitation. The influence of  
13 geography on the bacteriota was carried out including exclusively a single species (*C.*  
14 *stellaris*) and a single ecosystem (LW) to reduce the bias. The presence of a southern LW  
15 in Eastern North America, makes this region an ideal setting to explore the effect of  
16 geography. Finally, we probed for bacterial taxa occurring with reindeer lichens above a  
17 particular occupancy frequency threshold and, whose presence could be interesting for  
18 the host-bacteria symbiotic interaction. This is the first extensive study of the diversity  
19 and structure of the bacterial community of the boreal forest and their interactions with  
20 host lichens.

21

22

23

## MATERIALS AND METHODS



1 *Sample collections and processing*

2 We studied four species of reindeer lichens, *Cladonia mitis*, *C. rangiferina*, *C. stellaris*  
3 and *C. stygia* (Ahti, 1961). We collected samples along a latitudinal gradient in Eastern  
4 North America (province of Quebec) (Fig. 1). We gathered samples from the arctic  
5 tundra, forest tundra, LW (Kuujuarapik-Whapmagoostui), closed-crown forest, balsam  
6 fir-white birch and balsam fir-yellow birch forests. We included collections from the  
7 southernmost LW in North America (PNGJ) (Jasinski and Payette, 2005).

8         Sampling tools were sterilized between collections. Samples were placed into  
9 Eppendorf tubes and stored at -20 C. Herbarium vouchers were deposited in the Louis-  
10 Marie Herbarium (QFA), Laval University. A total of 192 samples were collected and  
11 identified using regional taxonomic publications (Brodo *et al.*, 2001). According to the  
12 morphological identification, 53 samples belonged to *C. mitis*, 42 to *C. rangiferina*, 84 to  
13 *C. stellaris* and 13 to *C. stygia*. Table S1 includes locality, vegetation zone (arctic, boreal  
14 or temperate) (Rowe, 1972), bioclimatic domain (arctic tundra, forest tundra, LW, closed-  
15 crown forest, balsam fir-white birch, balsam fir-yellow birch) (Rowe, 1972), altitude,  
16 type of genetic data generated and GenBank accession number.

17

18 *DNA extraction, PCR amplification and sequencing*

19 Genomic DNA of lichens was extracted following an established KLC protocol (Park *et*  
20 *al.*, 2014). The internal transcribed spacer 1 and 2 (hereafter ITS1 and ITS2) and the 5.8S  
21 of the nuclear ribosomal DNA (rDNA) were selected to perform molecular species  
22 delimitation. We successfully amplified and sequenced 104 lichen samples (forty

1 individuals of *C. mitis*, thirty-three *C. rangiferina*, twenty-one *C. stellaris* and ten of *C.*  
2 *stygia* (Table S1).

3         The V3-V4 region of the 16S rRNA gene was amplified following an amplicon  
4 sequencing protocol developed at Laval University (Vincent *et al.*, 2017). The locus-  
5 specific primers, BactV3-V4-F (341F) and BactV3-V4-R (805R), were selected for the  
6 first PCR from (Pr Herlemann *et al.*, 2011) and were modified to include Illumina TruSeq  
7 sequencing primers on their 5' ends. PCR was conducted in a total volume of 25 µl that  
8 contained 1X Q5 buffer (New England Biolabs), 0.25 µM of each primer, 200 µM of  
9 each dNTPs, 1 U of Q5 High-Fidelity DNA polymerase (New England Biolabs), and 1 µl  
10 of DNA. The second PCR introduced indexes and Illumina adapters used in library  
11 construction. Quality of the purified PCR products was checked on a 1% agarose gel and  
12 then quantified spectrophotometrically using a NanoDrop 1000 (Thermo Fisher  
13 Scientific). The libraries were pooled using an equimolar ratio, quantified, and sequenced  
14 on an Illumina MiSeq 300-bp paired-end run at the Plateforme d'Analyses Génomiques  
15 at the Institut de Biologie Intégrative et des Systèmes (Université Laval, Québec,  
16 Canada).

17

### 18 *Molecular delimitation of reindeer lichen species*

19 We conducted Bayesian inferences (BI) using the program MrBayes v.3.2 (Ronquist *et*  
20 *al.*, 2012) on the ITS dataset, including 126 sequences (22 from GenBank), and *Cladonia*  
21 *wainioi* as an outgroup (Stenroos *et al.*, 2018). We tested the best-fit substitution model  
22 using MrModelTest (Nylander, 2004) using the Akaike information criteria (AICc). The  
23 selected model was TrNef. Since the TrNef model is not available in MrBayes v.3.2, it

1 was substituted with HKY+ $\Gamma$  (Hasegawa *et al.*, 1985). The data were analysed using  
2 Markov chain Monte Carlo (MCMC), running two parallel analyses with four chains each  
3 for 20 million generations, sampling trees and parameters every 5000 generations. Chain  
4 convergence and stationarity was checked in Tracer v.1.6  
5 (<http://tree.bio.ed.ac.uk/software/tracer/>), making sure the average standard deviation of  
6 split frequencies remained below 0.01, and 25% of the sampled trees were discarded as  
7 burn-in. The *allcomat* options was included to have a binary tree, required for next set of  
8 analyses. The majority consensus rule tree was visualized in FigTree v.1.4.0  
9 (<http://tree.bio.ed.ac.uk/software/figtree/>).

10 We tested the Poisson tree processes (PTP) model of species delimitation (Zhang  
11 *et al.*, 2013) for the BI tree. PTP assumes that branching events within species will be  
12 more frequent than between species, with each substitution having a small probability of  
13 generating branching events (Kapli *et al.*, 2017). Unlike other species delimitation  
14 methods such as GMYC, PTP does not require an ultrametric tree, thus eliminating  
15 potential errors and confounding effects associated with molecular dating (Dellicour and  
16 Flot, 2018; Marki *et al.*, 2018). A Bayesian implementation of the PTP model (bPTP)  
17 (Zhang *et al.*, 2013) was performed on the online server <https://species.h-its.org/> using  
18 the BI tree. We ran 500000 generations with a thinning of 500 and a burn-in of 0.1, then  
19 assessed convergence visually using the MCMC iteration v. log-likelihood plots  
20 generated automatically.

21 Additionally, we applied the recently introduced multi-rate PTP (mPTP) (Kapli *et*  
22 *al.*, 2017) method, an improved version of the PTP for single-locus species delimitation.  
23 Instead of all species sharing the same rate of evolution ( $\lambda$ ) as in PTP, each species

1 branch has its own  $\lambda$  in the mPTP model. This method determines which number of  
2 species fits best to the given data by utilizing the Akaike Information Criterion (rather  
3 than a p-value test as in PTP) because of the different number of parameters. mPTP has  
4 been shown to be consistent and very effective for species delimitation in datasets with  
5 uneven sampling (Blair and Bryson, 2017) and it has also been successfully applied to  
6 lichens (Kistenich *et al.*, 2019). Using the stand-alone mPTP software (v.0.2.4) (Kapli *et*  
7 *al.*, 2017) we performed the analyses on BI tree. We first calculated the correct minimum  
8 branch length threshold with the `--minbr_auto` option. Then, we executed a ML species  
9 delimitation inference assuming a different coalescent rate for each delimited species (`--`  
10 `multi`) and removing the outgroup taxa (`--outgroup_crop`). To assess the confidence of the  
11 ML delimitation scheme, we conducted four MCMC runs for 20 million generations,  
12 sampling every 5000. The first two million generations were discarded as burn-in and  
13 analyses started with a random delimitation (`--mcmc_startrandom`). We compared results  
14 among MCMC runs to assess congruence.

15

#### 16 *Taxonomic assignment of bacterial sequences*

17 We used the DADA2 workflow to assign Amplicon Sequence Variants (ASVs; (Callahan  
18 *et al.*, 2017)) in R (Callahan *et al.*, 2016). We trimmed and filtered the raw reads, keeping  
19 only those with quality scores higher than 25. We dereplicated (`derepFastq`) all reads,  
20 estimated their error rates (`learnErrors`) and denoised them (`dada`). Then, forward and  
21 reverse reads were merged (`mergePairs`). All merged sequences with less than 430 bp  
22 and more than 450 bp were removed, and chimeras were excluded. We assigned

1 taxonomy based on the SILVA 138 database (McLaren, 2020) with minimum bootstrap  
2 set to 80.

3 The phangorn R package (Schliep, 2011; Schliep *et al.*, 2017) was used to build a  
4 phylogenetic tree, used in downstream analyses and to estimate phylogenetic distances  
5 between microbial communities. We first built a neighbor-joining tree, and then fit a  
6 GTR+ $\Gamma$ +I (Generalized time-reversible with gamma rate variation) maximum likelihood  
7 tree using the neighbor-joining tree as a starting point.

8 We synthesized all the data generated [ASV table, sample data, taxonomy table,  
9 phylogenetic tree and environmental variables (Table S1)] into a single phyloseq object  
10 with the R package phyloseq (McMurdie and Holmes, 2013). ASVs corresponding to  
11 chloroplast and mitochondria were removed from the dataset along with the bacteria for  
12 which no phylum could be assigned. We also removed phyla with less than ten  
13 corresponding ASVs in all samples combined. We determined prevalence (fraction of  
14 samples in which an ASV occurs) and used it to create a second phyloseq object  
15 including only the ASVs occurring in at least 5% of the samples.

16

### 17 *Characterization of bacterial communities in reindeer lichens*

18 We applied diversity and composition analyses to two set of data, host-species dataset to  
19 test bacteria host-selectivity in reindeer lichens (objective i), and LWs dataset to assess  
20 the influence of geography in *C. stellaris* (objective ii). With the R package phyloseq  
21 (McMurdie and Holmes, 2013), we estimated alpha-diversity within each sample based  
22 on number of observed ASVs, Shannon and Simpson effective indices. Shapiro-Wilk  
23 tests indicated if the data were normally distributed. We then used parametric (ANOVA)

1 or nonparametric (Kruskal-Wallis and U-Mann-Whitney tests) statistics methods to test  
2 for significant differences. To evaluate beta-diversity, meaning diversity between  
3 samples, the UniFrac distance matrix was calculated. Unlike other metrics, UniFrac takes  
4 into account phylogenetic information. Principal Coordinates Analysis (PCoA) and  
5 Double Principal Coordinates Analysis (DPCoA) based on the UniFrac distance matrix  
6 were plotted. To determine whether bacterial communities significantly change,  
7 PERMANOVA tests and pairwise comparison were conducted (2000 permutations) using  
8 the `adonis` and `pairwise.adonis` (Martinez Arbizu, 2020) functions in the `vegan` R package  
9 (Oksanen *et al.*, 2020). We transformed ASV counts per sample into relative abundance  
10 and compare it among species, and LWs. To identify specific ASVs that show differential  
11 abundance among taxa, the R package `DESeq2` (Love *et al.*, 2014) was used. We  
12 removed samples with less than 1000 reads and applied a normalized logarithmic  
13 transformation (`rlog`) on the ASVs. We estimated logarithmic fold change (LFC) and  
14 dispersion for each ASV. We obtained an adjusted p-value (`padj`) to corrected for false  
15 positives (False Discovery Rate, FDR) using the Benjamini-Hochberg (BH) correction.  
16 These ASVs sequences were aligned to sequences in NCBI database 16S ribosomal RNA  
17 (Bacteria and Archae) using `Megablast` optimize for highly similar sequences. The  
18 identifications considered successful were those with over 97% similarity. Below this  
19 percentage, we treated the sequences as relatives.

20

### 21 *Detection of core bacterial members in reindeer lichens*

22 To have a comprehensive estimate of the bacteria occurring across host reindeer lichens,  
23 the core bacteriota was identified with the `microbiome` R package (Lahti,). Due to the

1 lack of consensus about a fixed threshold (Risely, 2020), we considered as core bacteriota  
2 any taxon with a prevalence higher than 0.50, 0.75 or 0.90 (Jorge *et al.*, 2020). We  
3 included 189 lichen samples in the analysis. We pruned out the phyloseq object to retain  
4 those taxa with more than 1000 reads; in the end 153 samples were incorporated. We  
5 detected the core bacteriota with the function (*core\_members*) and estimated the total  
6 core abundance in each sample (*sample\_sums*). A heatmap was elaborated to visualize  
7 the results. In order to identify the core taxa as species level, ASVs sequences were  
8 aligned to sequences in NCBI database 16S ribosomal RNA (Bacteria and Archaea) using  
9 Megablast optimize for highly similar sequences and retaining those with Blast hits over  
10 97% identity. Bacterial sequences with identity below 97% were considered as relatives.

11 Due to the predominance of *C. stellaris* over the remaining reindeer lichens in  
12 Eastern Canada, we carried out the same analyses to predict the core bacteriota of this  
13 species using both the morphological and molecularly delimited taxa.

14

15

16

## RESULTS

### 17 *Identity of reindeer lichen species*

18 We successfully amplified the ITS locus of 104 samples representing four morphological  
19 species of *Cladonia*, *C. mitis*, *C. rangiferina*, *C. stellaris* and *C. stygia*, and 22 sequences  
20 from GenBank. The alignment had a total length of 906 bases (Appendix 1). Five  
21 hundred seventy-nine sites were conserved, 321 variable and 229 parsimony informative.  
22 The BI phylogenetic tree supported (PP  $\geq$  0.95) a clade including all the reindeer lichens  
23 (Fig. 2). *Cladonia stellaris* split into two groups, an unsupported (Clade *C stellaris* -

1 *species 2*, Fig. 2) and a supported clade (Clade *C stellaris* - *species 1*, Fig. 2), with the  
2 only exception of a single specimen from GenBank (accession number KP001212).  
3 Specimens of *C. mitis*, *C. rangiferina* and *C. stygia* clustered in a supported clade split  
4 into six unsupported subclades, four including *C. mitis* and two grouping *C. rangiferina*  
5 and *C. stygia*. The tree was used for species delimitation analyses.

6 The MCMC chains for the bPTP species delimitation method did not converge  
7 (Fig. S1) thus, the model not further pursued. The mPTP method inferred ten species,  
8 with identical results for the ML and the MCMC analyses. The ML delimitation results  
9 were strongly supported (average support values over 0.91), indicating that there is a 91%  
10 congruence between the support values and the point estimates. Equally, independent  
11 MCMC runs can also be quantify using the average standard deviation of delimitation  
12 support values (ASDDSV). Here, our four independent MCMC runs converged with  
13 ASDDSV below 0.001 (Kapli *et al.*, 2017). Fig. 2 shows the BI phylogenetic tree with  
14 the species identified by the mPTP method. *Cladonia mitis* was divided into four taxa; *C.*  
15 *stellaris* split into three taxa, one of them including exclusively a single specimen from  
16 GenBank; finally, individuals belonging to *C. rangiferina* and *C. stygia* were merged  
17 together but split into two species (Appendix 2).

18

### 19 *Dominance of Proteobacteria in reindeer lichens*

20 A total of 6204737 raw reads from 16 rRNA were identified from 189 samples of  
21 reindeer lichens (Table S2). After quality trimming, 817688 reads were kept. High-  
22 quality reads were taxonomic assigned to 12917 ASVs. Once we removed chloroplast,  
23 mitochondrial and phyla with less than ten ASVs, we retained 10969. The prevalence



1 filter (ASVs occurring in at least 5% of the samples) preserved 724 ASVs in ninety-eight  
2 samples (host-species dataset); and 1130 ASVs in forty-seven samples (LWs dataset). All  
3 the ASVs could be assigned at phylum level. The ASVs corresponded to Acidobacteriota,  
4 Cyanobacteria, Planctomycetota, Proteobacteria, Verrucomicrobiota and Eremiobacterota  
5 (candidate division WPS-2). Most of the sequences belonged to Proteobacteria (ca. 80%),  
6 followed by Eremiobacterota. Table S3 displays number of ASVs detected for each  
7 dataset at phylum level. Bacteria relative abundance of each lichen sample is showed in  
8 Fig. S2.

9

#### 10 *Absence of bacteria host-selectivity in reindeer lichens*

11 The bacterial alpha diversity within species delimited by mPTP methods (Fig. 3A) was  
12 significant between *C. rangiferina plus C. stygia sp 2* and *C. stellaris sp 1* in observed  
13 ASVs (p-value = 0.00084) and Shannon index (p-value = 0.00061) (Appendix 3). No  
14 significant differences in diversity were detected for the Simpson index (p-values > 0.05)  
15 (Appendix 3). In the PCoA, axis 1 and 2 explained 33.7% and 26.7% of the total  
16 variation among samples, respectively (Fig. S3A). In the DPCoA, CS1 explained 43.4%  
17 and CS2 explained 29.9% of the total variation (Fig. 4A). Bacterial communities of  
18 reindeer lichens were not grouped according to host species, and PERMANOVA tests  
19 found no significant association (Appendix 4). When considering morphological species  
20 (Fig. S4), diversity was significantly different among *C. mitis*, *C. rangiferina* and *C.*  
21 *stellaris* (p-values < 0.05), but it was not the case for *C. stygia* (Appendix 3).

22 Proteobacteria were dominant across all reindeer lichens (Fig. S2A), although  
23 there were some exceptions. Two lichens taxa, one identified as *C. mitis sp 1* (Alonso

1 422) and the other one as *C. rangiferina plus C. stygia sp 1* (Alonso 433), harbored  
2 mostly Eremiobacterota. Two other lichens belonging to *C. rangiferina plus C. stygia sp*  
3 2 included only Cyanobacteria (Alonso 423) or Planctomycetota (Alonso 475). DESeq2  
4 analysis identified ASVs that displayed a significant change of abundance ( $p_{adj} < 0.05$ )  
5 compared to host lichen species (Table S4A, S4B). Bacterial communities of reindeer  
6 lichens did not exhibited differences in abundance depending on the host-lichen species.  
7 For the eight molecularly delimited species (mPTP method), a single member of family  
8 Acetobacteraceae was detected (Table S4A), whereas for the four morphological species,  
9 one ASV belonged to Acidobacteriaceae was significantly different (Table S4B).

10

#### 11 *Effect of geography in the bacterial community of C. stellaris*

12 Lichens from northern and southern LWs exhibit significant differences ( $p$ -values  $< 0.05$ )  
13 in bacterial diversity (Fig. 3B) (Appendix 5). Number of observed ASVs as well as  
14 Shannon and Simpson indexes reported higher diversity for northern samples (Fig. 3B).  
15 The two first axes of the PCoA explained 28.1% and 21.8% of the total variation,  
16 respectively (Fig. S3B), whereas axes 1 and 2 of DPCoA explained 31.1% and 26.6%,  
17 respectively (Fig. 4B). Both ordination methods showed two different bacteria groups  
18 based on the latitude, northern and southern LWs (Figs. S3B, 4B), and PERMANOVA  
19 test confirmed this association ( $p$ -values  $< 0.05$ ) (Appendix 6). Relative abundance  
20 analysis pointed out the higher abundance of Eremiobacterota in northern LWs (Fig.  
21 S2B), with the exception of 5 samples where this phylum was nearly absent (samples  
22 Alonso 296, 312, 315, 326 and 354 in Fig. S2B). A total of 63 ASVs were significantly  
23 different in abundance between northern and southern LWs (Table S4C, Fig. S5A). The

1 genus *Endobacter* (Acetobacteraceae) was the only group significantly more abundant in  
2 the south (PNGJ) than in the north (Kuujuarapik) (Fig. S5B). According to the Blast  
3 alignment (Appendix 7), their closest known relative was *Gluconacetobacter tumulioli*  
4 with about 95.3% identity (Table S4C). The remaining ASVs were always more abundant  
5 in LWs northern Quebec (Kuujuarapik) (Fig. S5B) and they seem to be related to  
6 *Rhodopila globiformis* (Acetobacteraceae) (96.8% identity). *Tundrisphaera lichenicola*  
7 (Isosphaeraceae) was identified using the Blast algorithm (94.9% identity) (Table S4C).  
8 The closest relative of Eremiobacterota (15 ASVs) is the bacterium species  
9 *Desulfofundulus thermocisternus*, although its percentage of identity is below 85% (Table  
10 S4C). Finally, the family Caulobacteraceae might be represented by species related to  
11 *Brevundimonas vesicularis* (96.6% identity) (Table S4C).

12

### 13 *Reduced core bacteriota in reindeer lichens*

14 Forty-five ASVs were present in 153 reindeer lichens based on 0.50 prevalence-cut-off  
15 (Table S5A), representing a minor part (ca. 5%) of the total number of ASVs (863  
16 ASVs). All of them belonged to Proteobacteria, 32 were identified as genus *Methylocella*  
17 (family Beijerinckiaceae). A single ASV from Beijerinckiaceae as well as 12 members of  
18 family Acetobacteraceae were not assigned at genus level. Using the prevalence threshold  
19 of 0.75, one ASV (*Methylocella*) was detected (Table S5B), whereas no ASV occurred in  
20 all reindeer lichens at a prevalence of 0.90. The relative abundance of the common core  
21 bacteriota was variable among lichen samples. For a prevalence of 0.50, it ranged from  
22 2% in two samples of *C. stellaris* (Table S6) to 52% in one individual of *C. mitis* (Table  
23 S6). Using 0.75 as prevalence level, the highest relative abundance of the single ASV was

1 13% in one sample of *C. mitis*. Thirty-six of the 153 lichens lack this ASV (0% of  
2 relative abundance) (Table S6). The heatmap indicates the prevalence of each ASV for  
3 each abundance threshold (Fig. 5A). Four *Methylocella* ASVs presented the highest  
4 prevalence (yellow ASVs). The results derived from the Blast alignment are shown in  
5 Appendix 8. The potential identity of each ASV based on NCBI database is included in  
6 Table S5. *Methylorosula polaris* (identity over 97.7%) and sequences belonged to order  
7 Rhodospirillales (identify below 97%) were found in the common core bacteriota.

8 A total of 81 samples of *C. stellaris* shared 87, 34 and one ASVs for prevalence of  
9 0.50, 0.75 and 0.90, respectively (Table S7). The heatmap showed higher levels of  
10 prevalence for members of family Beijerinckiaceae than for the Acetobacteraceae (Fig.  
11 5B). With the best Blast hits, the common core bacteriota was constituted by 55 taxa of  
12 the bacteria species *Methylorosula polaris* (identity over 97.7%) and 30 taxa closely  
13 related to *Granulibacter bethesdensis* (identity around 96.6%) (Appendix 9). Two  
14 relatives of *Methylocystis bryophila* were also included in the common core of *C.*  
15 *stellaris* with a percentage of identity of ca. 94%. A Venn diagrams displayed the overlap  
16 between the common core bacteriota of reindeer lichens (47 ASVs) and that of *C.*  
17 *stellaris* (Fig. S6). All the ASVs associated to reindeer lichens were included in the  
18 common core of *C. stellaris*.

19

20

## 21 DISCUSSION

22 In this study, we present the first characterization of the bacterial community in reindeer  
23 lichens from Eastern North America. We analysed the influence of two factors (host-

1 identity and geography) in shaping the bacterial community composition, we verified the  
2 presence of a common core bacteriota and we identified the most abundant core taxa in  
3 all reindeer lichens, with emphasis on *C. stellaris*. Our results showed no changes of the  
4 bacterial community among host reindeer lichens, but significant differences in diversity  
5 and abundance of bacteria associated to *C. stellaris* from northern or southern LWs. We  
6 also revealed that reindeer lichens share a reduced common core bacteriota composed  
7 exclusively by Proteobacteria.

8

### 9 *Host-lichen identity does not determine bacterial community composition*

10 In order to test host-selectivity of the bacterial community in reindeer lichens, four  
11 morphological species were delimited based on the ITS molecular marker. This is the  
12 first attempt to compare molecular and morphological host-species delimitation in a  
13 microbiome study. Among the four morphological reindeer lichen species included here,  
14 the mPTP method identified eight species, four *C. mitis*, two *C. stellaris* and two *C.*  
15 *rangiferina* and *C. stygia* grouped together. The analyses of the bacterial community  
16 were applied to molecular and morphological species. Bacterial diversity within each  
17 sample hardly varies between the eight host species (delimited based on mPTP), but  
18 differences were observed between morphological species. Sierra et al. compared  
19 bacterial community in seven lichen genera, and they showed differences in alpha  
20 diversity between *Usnea* and *Hypotrachyna* (Sierra et al., 2020), although there was no  
21 information available at species level. Nonetheless, our results must be interpreted with  
22 caution. Single-locus species delimitation methods have limitations (Blair and Bryson,  
23 2017; Dellicour and Flot, 2018). Here, we have used the mPTP and bPTP methods to

1 compare different approaches, but we are aware that the molecular species delimitations  
2 might change using a different approach or increasing the number of loci.

3 In terms of abundance, all reindeer lichens harbour similar number of bacteria  
4 which do not cluster together by host species (neither molecular nor morphological  
5 species). Our results differ from previous studies which proved that the bacterial  
6 community in lichens were host-specific (e.g., (Grube *et al.*, 2009; Bates *et al.*, 2011;  
7 Sierra *et al.*, 2020)). Grube *et al.* found species-specific bacteria in three lichens with  
8 different growth form, fruticose, crustose, and foliose (Grube *et al.*, 2009). Sierra *et al.*  
9 also suggested bacteria host-specificity in seven genera of lichens with different thallus  
10 morphology (*Cora*, *Hypotrachyna*, *Peltigera* and *Sticta* are foliose, and *Usnea*, *Cladonia*  
11 and *Stereocaulon* are fruticose) (Sierra *et al.*, 2020). We suggest that host-specificity  
12 might be, in fact, growth-form-specificity. Our study focuses only on fruticose species  
13 with similar thallus morphology, which might explain the lack of selectivity. Park *et al.*  
14 demonstrated that bacteria grouped together depending on the growth forms of the lichen  
15 host (crustose, foliose or fruticose) (Park *et al.*, 2016). This assumption agrees with  
16 (Fernández-Brime *et al.*, 2019) who revealed that morphologically simple forms of  
17 lichenization (borderline lichens) do not influence bacterial communities but, complex  
18 thallus structure are required for the lichens to provide unique niches to host specific  
19 bacterial communities. A similar pattern was observed in green seaweeds where the  
20 bacterial variation was attributed to thallus differentiation (Morrissey *et al.*, 2019), or in  
21 the liverwort *Marchantia inflexa* whose differences in bacteriome seem correspond to  
22 differences in the physiology and morphology of male and female plants (Marks *et al.*,  
23 2017).

1

2 *Geography shapes the bacterial community composition*

3 Alonso-García et al. revealed that populations of *C. stellaris* in southern Quebec were not  
4 genetically different from those of northern LWs, and they suggested constant migration  
5 of lichen individuals between populations (Alonso-García *et al.*, 2021). However, the  
6 bacterial community associated to *C. stellaris* does not follow this pattern. We found  
7 significant differences between Kuujuarapik and PNGJ's LWs. Lichens from  
8 Kuujuarapik (northern LWs) exhibit higher diversity and abundance of bacteria. The  
9 effect of geography in the bacterial community of other lichens had been previously  
10 tested. Hodkinson et al. used different species of lichens to show that bacterial  
11 communities were significantly correlated with differences in large-scale geography  
12 (Alaska, Costa Rica, and North Carolina) (Hodkinson *et al.*, 2012). At smaller scale, the  
13 bacterial community of *L. pulmonaria* from the same sampling site showed higher  
14 similarity than those of distant populations (100 km of linear distance) (Aschenbrenner *et*  
15 *al.*, 2014). Bacteria associated to *C. aculeata* were, likewise, affected by geography  
16 although, contrary to our results, they were less diverse in high latitude (Antarctica and  
17 Iceland) than in extrapolar habitats (Spain and Germany) (Printzen *et al.*, 2012).

18 Differences in bacterial relative abundance between LWs were particularly  
19 evident for Eremiobacterota, a phylum usually found in acidic and cold environments  
20 (Grasby *et al.*, 2013; Trexler *et al.*, 2014; Bragina *et al.*, 2015) and putatively capable of  
21 anoxygenic carbon fixation in boreal mosses (Holland-Moritz *et al.*, 2018), although their  
22 role in reindeer lichens is unknown. Members of the family Caulobacteraceae  
23 (represented by species related to *Brevundimonas vesicularis*, ca. 96.6% identity) were

1 also more abundance in northern LWs. This family has been frequently associated to  
2 lichens (Hodkinson and Lutzoni, 2009; Hodkinson *et al.*, 2012; Aschenbrenner *et al.*,  
3 2014; Sigurbjörnsdóttir *et al.*, 2015; Park *et al.*, 2016; Noh *et al.*, 2020), but their  
4 functions have never been elucidated. Seven ASVs closely related to the anoxygenic  
5 phototrophic purple bacterium *Rhodopila globiformis* (Acetobacteraceae) were, likewise,  
6 significantly more abundance in Kuujjuarapik. The order Rhodospirillales is dominant in  
7 Antarctic lichens (Park *et al.*, 2016), and it may provide photosynthetic products, defends  
8 against pathogens and reduces the oxidative stress (Cernava *et al.*, 2017). Finally, with an  
9 identity of 94.9%, we found a close relative of *Tundrisphaera lichenicola*, significant  
10 more abundance northern Quebec. This bacterium of the phylum Planctomycetes was  
11 described from lichen-dominated tundra soils within the zone of forested tundra and  
12 discontinuous permafrost of northwest Siberia (Ivanova *et al.*, 2016; Kulichevskaya *et al.*,  
13 2017). To comprehend why northern LWs harbour more bacteria, we suggest focusing on  
14 the origin of those bacteria and the reason that encourage them to colonize the lichen. In  
15 addition, future studies should clarify the role that Eremiobacterota, Caulobacteraceae,  
16 Rhodospirillales and Planctomycetes play for reindeer lichens and/or for the boreal forest  
17 to better understand patterns of diversity and abundance.

18 Unlike aforementioned bacteria, the genus *Endobacter* (with *Gluconacetobacter*  
19 *tumulioli* as the closest known relative according to NCBI dataset) was more abundant in  
20 southern LWs. The specific role of *G. tumulioli* in the ecosystem remains unknown  
21 (Nishijima *et al.*, 2013), although other species of this genus, such as *G. diazotrophicus*,  
22 are involved in nitrogen fixation (Saravanan *et al.*, 2008). If this is the case, studies



1 should be carried out to investigate the reason why populations northern Quebec lack  
2 these nitrogen-fixing bacteria and how they supply nitrogen shortage.

3

#### 4 *Common core bacteriota is limited and homogeneous*

5 We have defined a common core bacteriota as the bacteria occurring with reindeer lichen  
6 above an occupancy frequency threshold of, at least, 0.50. Comparing 153 samples  
7 throughout Eastern Canada revealed a common core of 45 ASVs representatives of  
8 families Acetobacteraceae and Beijerinckiaceae (orders Acetobacterales and Rhizobiales,  
9 respectively). All these members were also found to be associated with the single species  
10 *C. stellaris*. Sierra et al. identified a reduced (16 OTUs, threshold  $\geq 0.90$ ), but more  
11 diverse core in different genera of Paramos' lichens (orders Rhodospirillales,  
12 Sphingomonadales, Rhizobiales, Acidobacteriales, and the phylum Cyanobacteria)  
13 (Sierra et al., 2020). The core bacteriota of Austrian populations of *L. pulmonaria*  
14 represented 16% of the OTUs (ca. 5% in reindeer lichens) from six phyla  
15 (Alphaproteobacteria, Sphingobacteria, Actinobacteria, Nostocophycideae,  
16 Spartobacteria and Deltaproteobacteria), but it was considered as a regional core  
17 (Aschenbrenner et al., 2014). The reason why reindeer lichens hardly share a core  
18 bacteriota might be due to the larger size of our study area. Detecting the core across sites  
19 or populations can provide a more reduce core bacteriota but, as suggested by (Risely,  
20 2020), allow us to identify potential candidates for further investigation with regard to  
21 host-microbe interactions. Nevertheless, we should consider that bacteria can have high  
22 occupancy frequency within the host population for many reasons (e.g., they are common

1 in the environment (David *et al.*, 2014) or highly competitive against other microbes  
2 (Coyte and Rakoff-Nahoum, 2019)) and is not necessarily linked to host function.

3 Blast hits of most of the ASVs composing the core bacteriota of reindeer lichens  
4 belonged to *Methylosorusula polaris* (ca. 97.93% identity), a member of the order  
5 Rhizobiales isolated from methane-oxidizing communities of soil from the polar tundra  
6 (Berestovskaya *et al.*, 2012). *Methylosorusula polaris* had been previously detected  
7 (identity 94.5%) at the apical and middle parts of *C. squamosa* thalli (Noh *et al.*, 2020).  
8 In general, Rhizobiales occurs in lichens (Hodkinson and Lutzoni, 2009), where they are  
9 known to perform functions supporting the symbiosis, including auxin and vitamin  
10 production, nitrogen fixation and stress protection (Erlacher *et al.*, 2015; Cernava *et al.*,  
11 2017). The remaining ASVs from the core bacteriota belonged to Acetobacterales and  
12 they might be relatives of the human pathogen *Granulibacter bethesdensis* (ca. 96.6%  
13 identity) (Greenberg *et al.*, 2006), the phototrophic *Rhodophila globiformis* (ca. 96.4%  
14 identity), *Endobacter medicaginis* (ca. 96.1% identity) or different species of genus  
15 *Gluconacetobacter* (ca. 95.9% of identity) involved in nitrogen-fixation (Fuentes-  
16 Ramírez *et al.*, 2001; Saravanan *et al.*, 2008).

17 *Cladonia stellaris* harbours almost the same common core bacteriota than all  
18 reindeer lichens. The main different is due to the number of ASVs, which is higher in *C.*  
19 *stellaris* (45 versus 87 ASVs). In addition, *C. stellaris* included *Methylocystis bryophila*  
20 (Belova *et al.*, 2013), a bacterium isolated from acidic *Sphagnum* peat in Europe.

21

22 *Conclusions*

1 We provide the first assessment of the lichen microbiome in the boreal forest of Eastern  
2 Canada. Here, we answer some key aspect of lichen bacteriome from northern  
3 ecosystems and highlight future research venues. We show a dominance of  
4 Proteobacteria in reindeer lichens and an absence of bacteria host-selectivity. We suggest  
5 that thallus morphology, and consequently growth-form, may have an effect on the  
6 bacterial community composition. Our results evidence the influence of geography in  
7 shaping the bacterial community of reindeer lichens. A single species from one particular  
8 ecosystem exhibits significant higher diversity and abundance of bacteria in northern  
9 lichen woodlands. Further studies should include environmental variables, such as  
10 temperature, humidity, soil pH or light intensity, to elucidate whether abiotic factors also  
11 influence the microbial community of lichens from the boreal forest. Likewise, we  
12 suggest examining the role of soil microbial communities as a source of bacteria and the  
13 way they colonize the lichen. Regarding the core bacteriota, we identify a reduced core in  
14 reindeer lichens comprised mainly of *Methylosula polaris*. A deeper understanding of  
15 the interaction between reindeer lichens and *Methylosula polaris* would help to  
16 discover ecological and functional processes at the organismal and ecosystem level.

17

18

#### 19 SUPPLEMENTARY DATA

20 Supplementary data are available online at XXXXX and consist of the following. Six  
21 figures; seven tables; nine appendices and three scripts. The datasets generated and  
22 analysed during the current study are available in the NCBI SRA archive under  
23 Bioprojects PRJNA593044 and PRJNA687262.

1

2

3

## FUNDING

4 This research was conducted with financial support from the Spanish “Fundación Séneca-

5 Agencia de Ciencia y Tecnología de la Región de Murcia” (project 20369/PD/17); the

6 program Sentinel North financed by the Canada First Research Excellence Fund

7 (CFREF); the CRNSG- RGPIN/05967-2016 and Fondation Canadienne pour l’innovation

8 (project 36781).

9

10

11

## ACKNOWLEDGEMENTS

12 We thank the “Plateforme Analyse génomique” and “Plateforme Bio-informatique” from

13 the “Institut de Biologie Intégrative et des Systèmes” (Laval University, Quebec) for

14 sequencing and for advice during the analysis of data. All manipulation of sequence reads

15 was implemented on the UNIX server of Laval University. We thank the authorities of

16 the “Parc national des Grands-Jardins (SEPAQ)” for giving the permission to collect

17 samples. We are also grateful to Catherine Chagnon for samples northern Quebec and

18 Troy McMullin for pictures of lichen species.

19

20

21

## LITERATURE CITED

22 ***ACIA Impacts of a Warming Arctic. 2004.*** Cambridge, UK: Cambridge University Press.

23 **Agler MT, Ruhe J, Kroll S, *et al.* 2016.** Microbial Hub Taxa Link Host and Abiotic

- 1           Factors to Plant Microbiome Variation. *PLoS Biology* **14**: e1002352.
- 2   **Ahti T. 1961.** *Taxonomic studies on reindeer lichens (Cladonia, subgenus Cladina).*
- 3           Helsinki: Societas Zoologica Botanica Fennica “Vanamo.”
- 4   **Ainsworth TD, Krause L, Bridge T, et al. 2015.** The coral core microbiome identifies
- 5           rare bacterial taxa as ubiquitous endosymbionts. *ISME Journal* **9**: 2261–2274.
- 6   **Alonso-García M, Grewe F, Payette S, Villarreal A. JC. 2021.** Population genomics of
- 7           a reindeer lichen species from North-American lichen woodlands. *American*
- 8           *Journal of Botany.*
- 9   **Aschenbrenner IA, Cardinale M, Berg G, Grube M. 2014.** Microbial cargo: Do
- 10           bacteria on symbiotic propagules reinforce the microbiome of lichens?
- 11           *Environmental Microbiology* **16**: 3743–3752.
- 12   **Aschenbrenner IA, Cernava T, Berg G, Grube M. 2016.** Understanding Microbial
- 13           Multi-Species Symbioses. *Frontiers in Microbiology* **7**: 180.
- 14   **Athukorala SNP, Pino-Bodas R, Stenroos S, Ahti T, Piercey-Normore MD. 2016.**
- 15           Phylogenetic relationships among reindeer lichens of North America.
- 16           *Lichenologist* **48**: 209–227.
- 17   **Auclair AND, Rencz AN. 1982.** Concentration, mass, and distribution of nutrients in a
- 18           subarctic *Picea mariana* - *Cladonia alpestris* ecosystem ( Canada). *Canadian*
- 19           *Journal of Forest Research* **12**: 947–968.
- 20   **Bates ST, Cropsey GWG, Caporaso JG, Knight R, Fierer N. 2011.** Bacterial
- 21           communities associated with the lichen symbiosis. *Applied and Environmental*
- 22           *Microbiology* **77**: 1309–1314.
- 23   **Belova SE, Kulichevskaya IS, Bodelier PLE, Dedysh SN. 2013.** Methylocystis

- 1           bryophila sp. nov., a facultatively methanotrophic bacterium from acidic  
2           Sphagnum peat, and emended description of the genus Methylocystis (ex  
3           Whittenbury et al. 1970) Bowman et al. 1993. *International Journal of*  
4           *Systematic and Evolutionary Microbiology* **63**: 1096–1104.
- 5           **Berestovskaya JJ, Kotsyurbenko OR, Tourova TP, et al. 2012.** Methylospora polaris  
6           gen. nov., sp. nov., an aerobic, facultatively methylotrophic psychrotolerant  
7           bacterium from tundra wetland soil. *International Journal of Systematic and*  
8           *Evolutionary Microbiology* **62**: 638–646.
- 9           **Berg G, Rybakova D, Fischer D, et al. 2020.** Microbiome definition re-visited: old  
10           concepts and new challenges. *Microbiome* **8**: 103.
- 11           **Blair C, Bryson RW. 2017.** Cryptic diversity and discordance in single-locus species  
12           delimitation methods within horned lizards (Phrynosomatidae: Phrynosoma).  
13           *Molecular Ecology Resources* **17**: 1168–1182.
- 14           **Bouchard R, Peñaloza-Bojacá G, Toupin S, et al. 2020.** Contrasting bacteriome of the  
15           hornwort *Leiosporoceros dussii* in two nearby sites with emphasis on the  
16           hornwort-cyanobacterial symbiosis. *Symbiosis* **81**: 39–52.
- 17           **Bragina A, Berg C, Berg G. 2015.** The core microbiome bonds the Alpine bog  
18           vegetation to a transkingdom metacommunity. *Molecular Ecology* **24**: 4795–  
19           4807.
- 20           **Brodo IM, Sharnoff SD, Sharnoff S. 2001.** *Lichens of North America*. New Haven:  
21           Yale University Press.
- 22           **Bubrick P, Frensdorff A, Galun M. 1985.** Selectivity in the Lichen Symbiosis In:  
23           *Lichen Physiology and Cell Biology*. Springer US, 319–334.

- 1 **Callahan BJ, McMurdie PJ, Holmes SP. 2017.** Exact sequence variants should replace  
2 operational taxonomic units in marker-gene data analysis. *ISME Journal* **11**:  
3 2639–2643.
- 4 **Callahan BJ, Sankaran K, Fukuyama JA, McMurdie PJ, Holmes SP. 2016.**  
5 Bioconductor workflow for microbiome data analysis: From raw reads to  
6 community analyses [version 1; referees: 3 approved]. *F1000Research* **5**: 1–49.
- 7 **Cardinale M, Grube M, Vieirade Castro Jr J, Müller H, Berg G. 2012.** Bacterial taxa  
8 associated with the lung lichen *Lobaria pulmonaria* are differentially shaped by  
9 geography and habitat. *FEMS Microbiology Letters*: 111–115.
- 10 **Cardinale M, Steinová J, Rabensteiner J, Berg G, Grube M. 2012.** Age, sun and  
11 substrate: Triggers of bacterial communities in lichens. *Environmental*  
12 *Microbiology Reports* **4**: 23–28.
- 13 **Cardinale M, Vieira de Castro J, Muller H, Berg G, Grube M. 2008.** In situ analysis  
14 of the bacterial community associated with the reindeer lichen *Cladonia*  
15 *arbuscula* reveals predominance of Alphaproteobacteria. *FEMS Microbiology*  
16 *Ecology* **66**: 63–71.
- 17 **Cernava T, Erlacher A, Aschenbrenner IA, et al. 2017.** Deciphering functional  
18 diversification within the lichen microbiota by meta-omics. *Microbiome* **5**: 82.
- 19 **Chappell TM, Rausher MD. 2016.** Evolution of host range in *Coleosporium ipomoeae*,  
20 a plant pathogen with multiple hosts. *Proceedings of the National Academy of*  
21 *Sciences of the United States of America* **113**: 5346–5351.
- 22 **Coyte KZ, Rakoff-Nahoum S. 2019.** Understanding Competition and Cooperation  
23 within the Mammalian Gut Microbiome. *Current Biology* **29**: R538–R544.

- 1 **Cullen CM, Aneja KK, Beyhan S, et al. 2020.** Emerging Priorities for Microbiome  
2 Research. *Frontiers in Microbiology* **11**: 136.
- 3 **David LA, Maurice CF, Carmody RN, et al. 2014.** Diet rapidly and reproducibly alters  
4 the human gut microbiome. *Nature* **505**: 559–563.
- 5 **Delgado-Baquerizo M, Oliverio AM, Brewer TE, et al. 2018.** A global atlas of the  
6 dominant bacteria found in soil. *Science* **359**: 320–325.
- 7 **Dellicour S, Flot JF. 2018.** The hitchhiker’s guide to single-locus species delimitation.  
8 *Molecular Ecology Resources* **18**: 1234–1246.
- 9 **Denison ER, Rhodes RG, McLellan WA, Pabst DA, Erwin PM. 2020.** Host phylogeny  
10 and life history stage shape the gut microbiome in dwarf (*Kogia sima*) and  
11 pygmy (*Kogia breviceps*) sperm whales. *Scientific Reports* **10**: 1–13.
- 12 **Douglas AE. 2018.** The *Drosophila* model for microbiome research. *Lab Animal* **47**:  
13 157–164.
- 14 **Erlacher A, Cernava T, Cardinale M, et al. 2015.** Rhizobiales as functional and  
15 endosymbiotic members in the lichen symbiosis of *Lobaria pulmonaria* L.  
16 *Frontiers in Microbiology* **6**: 53.
- 17 **Faure D, Simon JC, Heulin T. 2018.** Holobiont: a conceptual framework to explore the  
18 eco-evolutionary and functional implications of host–microbiota interactions in  
19 all ecosystems. *New Phytologist* **218**: 1321–1324.
- 20 **Federici S, Nobs SP, Elinav E. 2020.** Phages and their potential to modulate the  
21 microbiome and immunity. *Cellular and Molecular Immunology*: 1–16.
- 22 **Fernández-Brime S, Muggia L, Maier S, Grube M, Wedin M. 2019.** Bacterial  
23 communities in an optional lichen symbiosis are determined by substrate, not



- 1           algal photobionts. *FEMS Microbiology Ecology* **95**: 1–11.
- 2   **Fuentes-Ramírez LE, Bustillos-Cristales R, Tapia-Hernández A, et al. 2001.** Novel  
3           nitrogen-fixing acetic acid bacteria, *Gluconacetobacter johannae* sp. nov. and  
4           *Gluconacetobacter azotocaptans* sp. nov., associated with coffee plants.  
5           *International Journal of Systematic and Evolutionary Microbiology* **51**: 1305–  
6           1314.
- 7   **Grasby SE, Richards BC, Sharp CE, Brady AL, Jones GM, Dunfield PF. 2013.** The  
8           paint pots, Kootenay National Park, Canada - a natural acid spring analogue for  
9           mars. *Canadian Journal of Earth Sciences* **50**: 94–108.
- 10   **Greenberg DE, Porcella SF, Stock F, et al. 2006.** *Granulibacter bethesdensis* gen. nov.,  
11           sp. nov., a distinctive pathogenic acetic acid bacterium in the family  
12           Acetobacteraceae. *International Journal of Systematic and Evolutionary*  
13           *Microbiology* **56**: 2609–2616.
- 14   **Grube M, Berg G. 2009.** Microbial consortia of bacteria and fungi with focus on the  
15           lichen symbiosis. *Fungal Biology Reviews* **23**: 72–85.
- 16   **Grube M, Cardinale M, De Castro JV, Müller H, Berg G. 2009.** Species-specific  
17           structural and functional diversity of bacterial communities in lichen symbioses.  
18           *ISME Journal* **3**: 1105–1115.
- 19   **Grube M, Cernava T, Soh J, et al. 2015.** Exploring functional contexts of symbiotic  
20           sustain within lichen-associated bacteria by comparative omics. *ISME Journal* **9**:  
21           412–424.
- 22   **Hasegawa M, Kishino H, Yano T aki. 1985.** Dating of the human-ape splitting by a  
23           molecular clock of mitochondrial DNA. *Journal of Molecular Evolution* **22**:

- 1           160–174.
- 2   **Hassani MA, Durán P, Hacquard S. 2018.** Microbial interactions within the plant  
3           holobiont. *Microbiome* **6**: 58.
- 4   **Hodkinson BP, Gottel NR, Schadt CW, Lutzoni F. 2012.** Photoautotrophic symbiont  
5           and geography are major factors affecting highly structured and diverse bacterial  
6           communities in the lichen microbiome. *Environmental Microbiology* **14**: 147–  
7           161.
- 8   **Hodkinson BP, Lutzoni F. 2009.** A microbiotic survey of lichen-associated bacteria  
9           reveals a new lineage from the Rhizobiales. *Symbiosis* **49**: 163–180.
- 10   **Holland-Moritz H, Stuart J, Lewis LR, et al. 2018.** Novel bacterial lineages associated  
11          with boreal moss species. *Environmental Microbiology* **20**: 2625–2638.
- 12   **Huse SM, Ye Y, Zhou Y, Fodor AA. 2012.** A Core Human Microbiome as Viewed  
13          through 16S rRNA Sequence Clusters (N Ahmed, Ed.). *PLoS ONE* **7**: e34242.
- 14   **Ivanova AA, Kulichevskaya IS, Merkel AY, Toshchakov S V., Dedysh SN. 2016.**  
15          High Diversity of Planctomycetes in Soils of Two Lichen-Dominated Sub-Arctic  
16          Ecosystems of Northwestern Siberia. *Frontiers in Microbiology* **7**: 2065.
- 17   **Jasinski JPP, Payette S. 2005.** The creation of alternative stable states in the southern  
18          boreal forest, Québec, Canada. *Ecological Monographs* **75**: 561–583.
- 19   **Jobbágy EG, Jackson RB. 2000.** The vertical distribution of soil organic carbon and its  
20          relation to climate and vegetation. *Ecological Applications* **10**: 423–436.
- 21   **Johnson EA, Miyanishi K. 1999.** Subarctic lichen woodlands In: Anderson R, Fralish J,  
22          Baskin J, eds. *Savanna, barren and rock outcrop plant communities of North*  
23          *America*. Cambridge, UK: Cambridge University Press, 421–436.

- 1 **Jorge F, Dheilly NM, Poulin R. 2020.** Persistence of a Core Microbiome Through the  
2           Ontogeny of a Multi-Host Parasite. *Frontiers in Microbiology* **11**.
- 3 **Kapli P, Lutteropp S, Zhang J, et al. 2017.** Multi-rate Poisson tree processes for single-  
4           locus species delimitation under maximum likelihood and Markov chain Monte  
5           Carlo. *Bioinformatics* **33**: 1630–1638.
- 6 **Kistenich S, Bendiksby M, Ekman S, Cáceres MES, Hernández JEM, Timdal E.**  
7           **2019.** Towards an integrative taxonomy of Phyllopora (Ramalinaceae).  
8           *Lichenologist* **51**: 323–392.
- 9 **Kulichevskaya IS, Ivanova AA, Detkova EN, et al. 2017.** Tundrisphaera lichenicola  
10          gen. nov., sp. nov., a psychrotolerant representative of the family Isosphaeraceae  
11          from lichen-dominated tundra soils. *International Journal of Systematic and*  
12          *Evolutionary Microbiology* **67**: 3583–3589.
- 13 **Lahti L.** Tools for microbiome analysis in R. Microbiome package version 4.
- 14 **Larsen. 2014.** Impacts, Adaptation, and Vulnerability In: Field CB, ed. *Climatic Change*.  
15          Cambridge, NY: Cambridge University Press, 1567–1612.
- 16 **Lavoie C, Renaudin M, McMullin RT, et al. 2020.** Extremely low genetic diversity of  
17          Stigonema associated with Stereocaulon in eastern Canada. *The Bryologist* **123**:  
18          188.
- 19 **Lee MD, Kling JD, Araya R, Ceh J. 2018.** Jellyfish Life Stages Shape Associated  
20          Microbial Communities, While a Core Microbiome Is Maintained Across All.  
21          *Frontiers in Microbiology* **9**: 1534.
- 22 **Ley RE, Hamady M, Lozupone C, et al. 2008.** Evolution of mammals and their gut  
23          microbes. *Science* **320**: 1647–1651.

- 1 **Lloyd-Price J, Mahurkar A, Rahnavard G, et al. 2017.** Strains, functions and  
2 dynamics in the expanded Human Microbiome Project. *Nature* **550**: 61–66.
- 3 **Love MI, Huber W, Anders S. 2014.** Moderated estimation of fold change and  
4 dispersion for RNA-seq data with DESeq2. *Genome Biology* **15**: 550.
- 5 **Margulis L. 1991.** Symbiosis as a source of evolutionary innovation: speciation and  
6 morphogenesis In: MA, MLFR, eds. *Symbiogenesis and Symbiogenesis*.  
7 Cambridge, NY: MIT Press, 1–14.
- 8 **Marki PZ, Fjeldså J, Irestedt M, Jønsson KA. 2018.** Molecular phylogenetics and  
9 species limits in a cryptically coloured radiation of Australo-Papuan passerine  
10 birds (Pachycephalidae: Colluricincla). *Molecular Phylogenetics and Evolution*  
11 **124**: 100–105.
- 12 **Marks RA, Smith JJ, Cronk Q, McLetchie DN. 2017.** Variation in the bacteriome of  
13 the tropical liverwort, *Marchantia inflexa*, between the sexes and across habitats.  
14 *Symbiosis* **75**: 93–101.
- 15 **Martinez Arbizu P. 2020.** pairwiseAdonis: Pairwise multilevel comparison using  
16 adonis. R package version 0.4.
- 17 **McFall-Ngai M. 2008.** Are biologists in “future shock”? Symbiosis integrates biology  
18 across domains. *Nature Reviews Microbiology* **6**: 789–792.
- 19 **McLaren MR. 2020.** Silva SSU taxonomic training data formatted for DADA2 (Silva  
20 version 138).
- 21 **McMurdie PJ, Holmes S. 2013.** phyloseq: An R Package for Reproducible Interactive  
22 Analysis and Graphics of Microbiome Census Data (M Watson, Ed.). *PLoS*  
23 *ONE* **8**: e61217.

- 1 **Morneau C, Payette S. 1989.** Postfire lichen-spruce woodland recovery at the limit of the  
2 boreal forest in northern Quebec. *Canadian Journal of Botany* **67**: 2770–2782.
- 3 **Morrissey KL, Çavaş L, Willems A, De Clerck O. 2019.** Disentangling the Influence  
4 of Environment, Host Specificity and Thallus Differentiation on Bacterial  
5 Communities in Siphonous Green Seaweeds. *Frontiers in Microbiology* **10**: 717.
- 6 **Mushegian AA, Peterson CN, Baker CCM, Pringle A. 2011.** Bacterial diversity across  
7 individual lichens. *Applied and Environmental Microbiology* **77**: 4249–4252.
- 8 **Nishijima M, Tazato N, Handa Y, et al. 2013.** *Gluconacetobacter tumulisoli* sp. nov.,  
9 *Gluconacetobacter Takamatsuzukensis* sp. nov. and *Gluconacetobacter aggeris*  
10 sp. nov., isolated from Takamatsuzuka tumulus samples before and during the  
11 dismantling work in 2007. *International Journal of Systematic and Evolutionary*  
12 *Microbiology* **63**: 3981–3988.
- 13 **Noh H-J, Lee YM, Park CH, Lee HK, Cho J-C, Hong SG. 2020.** Microbiome in  
14 *Cladonia squamosa* Is Vertically Stratified According to Microclimatic  
15 Conditions. *Frontiers in Microbiology* **11**.
- 16 **Nylander JAA. 2004.** MrModeltest Version 2. Program Distributed by the Author.
- 17 **Oksanen J, Blanchet FG, Friendly M, et al. 2020.** *Vegan: community ecology package*.  
18 <http://cran.r-project.org/package=vegan>. 30 Nov. 2020.
- 19 **Pan X, Yang Y, Zhang J-R. 2014.** Molecular basis of host specificity in human  
20 pathogenic bacteria. *Emerging Microbes & Infections* **3**: 1–10.
- 21 **Park S, Jang S, Oh S, Kim JA, Hur J. 2014.** An Easy , Rapid , and Cost-Effective  
22 Method for DNA Extraction from Various Lichen Taxa and Specimens Suitable  
23 for Analysis of Fungal and Algal Strains. *Mycobiology* **42**: 311–320.

- 1 **Park CH, Kim KM, Kim OS, Jeong G, Hong SG. 2016.** Bacterial communities in  
2 Antarctic lichens. *Antarctic Science* **28**: 455–461.
- 3 **Payette S. 1992.** Fire as a controlling process in the North American boreal forest In:  
4 Herman H. S, Rik L, Gordon B. B, eds. *A systems analysis of the global boreal*  
5 *forest*. Cambridge, NY: Cambridge University Press, 144–169.
- 6 **Pearce DS, Hoover BA, Jennings S, Nevitt GA, Docherty KM. 2017.** Morphological  
7 and genetic factors shape the microbiome of a seabird species (*Oceanodroma*  
8 *leucorhoa*) more than environmental and social factors. *Microbiome* **5**: 146.
- 9 **Pr Herlemann D, Labrenz M, Jü Rgens K, Bertilsson S, Waniek JJ, Andersson AF.**  
10 **2011.** Transitions in bacterial communities along the 2000 km salinity gradient  
11 of the Baltic Sea. *The ISME Journal* **5**: 1571–1579.
- 12 **Printzen C, Fernández-Mendoza F, Muggia L, Berg G, Grube M. 2012.**  
13 Alphaproteobacterial communities in geographically distant populations of the  
14 lichen *Cetraria aculeata*. *FEMS Microbiology Ecology* **82**: 316–325.
- 15 **Rahme LG, Ausubel FM, Cao H, et al. 2000.** Plants and animals share functionally  
16 common bacterial virulence factors. *Proceedings of the National Academy of*  
17 *Sciences of the United States of America* **97**: 8815–8821.
- 18 **Relman DA. 2008.** “Til death do us part”: Coming to terms with symbiotic relationships.  
19 *Nature Reviews Microbiology* **6**: 721–724.
- 20 **Reveillaud J, Maignien L, Eren MA, et al. 2014.** Host-specificity among abundant and  
21 rare taxa in the sponge microbiome. *ISME Journal* **8**: 1198–1209.
- 22 **Risely A. 2020.** Applying the core microbiome to understand host–microbe systems (A  
23 Tate, Ed.). *Journal of Animal Ecology* **89**: 1549–1558.

- 1 **Roi GHL. 2018.** Boreal Zone. *The Canadian Encyclopedia*.
- 2 **Ronquist F, Teslenko M, Van Der Mark P, et al. 2012.** MrBayes 3.2: Efficient  
3 Bayesian Phylogenetic Inference and Model Choice Across a Large Model  
4 Space. *Systematic Biology* **61**: 539–542.
- 5 **Rothschild D, Weissbrod O, Barkan E, et al. 2018.** Environment dominates over host  
6 genetics in shaping human gut microbiota. *Nature* **555**: 210–215.
- 7 **Rowe JS. 1972.** *Forest Regions of Canada*. Ottawa: Canadian Forest Service  
8 Publications 1300.
- 9 **Saravanan VS, Madhaiyan M, Osborne J, Thangaraju M, Sa TM. 2008.** Ecological  
10 occurrence of *Gluconacetobacter diazotrophicus* and nitrogen-fixing  
11 Acetobacteraceae members: Their possible role in plant growth promotion.  
12 *Microbial Ecology* **55**: 130–140.
- 13 **Schlechter RO, Miebach M, Remus-Emsermann MNP. 2019.** Driving factors of  
14 epiphytic bacterial communities: A review. *Journal of Advanced Research* **19**:  
15 57–65.
- 16 **Schliep KP. 2011.** phangorn: Phylogenetic analysis in R. *Bioinformatics* **27**: 592–593.
- 17 **Schliep K, Potts AJ, Morrison DA, Grimm GW. 2017.** Intertwining phylogenetic trees  
18 and networks (R Fitzjohn, Ed.). *Methods in Ecology and Evolution* **8**: 1212–  
19 1220.
- 20 **Sepulveda J, Moeller AH. 2020.** The Effects of Temperature on Animal Gut  
21 Microbiomes. *Frontiers in Microbiology* **11**: 384.
- 22 **Shaver GR, Chapin FS. 1991.** Production: Biomass relationships and element cycling in  
23 contrasting arctic vegetation types. *Ecological Monographs* **61**: 1–23.

- 1 **Sierra MA, Danko DC, Sandoval TA, et al. 2020.** The Microbiomes of Seven Lichen  
2 Genera Reveal Host Specificity, a Reduced Core Community and Potential as  
3 Source of Antimicrobials. *Frontiers in Microbiology* **11**: 398.
- 4 **Sigurbjörnsdóttir MA, Andrésón S. Ó, Vilhelmsson O. 2015.** Analysis of the  
5 *Peltigera membranacea* metagenome indicates that lichen-associated bacteria are  
6 involved in phosphate solubilization. *Microbiology* **161**: 989–996.
- 7 **Simon JC, Marchesi JR, Mougél C, Selosse MA. 2019.** Host-microbiota interactions:  
8 From holobiont theory to analysis. *Microbiome* **7**: 5.
- 9 **Skogland T. 1984.** Wild reindeer foraging-niche organization. *Ecography* **7**: 345–379.
- 10 **Stenroos S, Pino-Bodas R, Hyvönen J, Lumbsch HT, Ahti T. 2018.** Phylogeny of the  
11 family Cladoniaceae (Lecanoromycetes, Ascomycota) based on sequences of  
12 multiple loci. *Cladistics* **35**: 351–384.
- 13 **Svihus B, Holand Ø. 2000.** *Lichen polysaccharides and their relation to*  
14 *reindeer/caribou nutrition*.
- 15 **Tarnocai C, Canadell JG, Schuur EAG, Kuhry P, Mazhitova G, Zimov S. 2009.** Soil  
16 organic carbon pools in the northern circumpolar permafrost region. *Global*  
17 *Biogeochemical Cycles* **23**: 1–11.
- 18 **Thompson ID, Wiebe PA, Mallon E, et al. 2015.** Factors influencing the seasonal diet  
19 selection by woodland caribou (*rangifer tarandus tarandus*) in boreal forests in  
20 ontario. *Canadian Journal of Zoology* **93**: 87–98.
- 21 **Trexler R, Solomon C, Brislawn CJ, et al. 2014.** Assessing impacts of unconventional  
22 natural gas extraction on microbial communities in headwater stream ecosystems  
23 in Northwestern Pennsylvania. *Frontiers in Microbiology* **5**: 522.



- 1 **Trivedi P, Leach JE, Tringe SG, Sa T, Singh BK. 2020.** Plant-microbiome  
2 interactions: from community assembly to plant health *Nature reviews |*  
3 *Microbiology. Nature Reviews Microbiology.*
- 4 **Turnbaugh PJ, Ley RE, Hamady M, Fraser-Liggett CM, Knight R, Gordon JI.**  
5 **2007.** The Human Microbiome Project. *Nature* **449**: 804–810.
- 6 **Vandenkoornhuyse P, Quaiser A, Duhamel M, Le Van A, Dufresne A. 2015.** The  
7 importance of the microbiome of the plant holobiont. *New Phytologist* **206**:  
8 1196–1206.
- 9 **Vincent AT, Derome N, Boyle B, Culley AI, Charette SJ. 2017.** Next-generation  
10 sequencing (NGS) in the microbiological world: How to make the most of your  
11 money. *Journal of Microbiological Methods* **138**: 60–71.
- 12 **Wagner MR, Lundberg DS, Del Rio TG, Tringe SG, Dangl JL, Mitchell-Olds T.**  
13 **2016.** Host genotype and age shape the leaf and root microbiomes of a wild  
14 perennial plant. *Nature Communications* **7**: 12151.
- 15 **Youngblut ND, Reischer GH, Walters W, et al. 2019.** Host diet and evolutionary  
16 history explain different aspects of gut microbiome diversity among vertebrate  
17 clades. *Nature Communications* **10**: 3500.
- 18 **Zhang J, Kapli P, Pavlidis P, Stamatakis A. 2013.** A general species delimitation  
19 method with applications to phylogenetic placements. *Bioinformatics* **29**: 2869–  
20 2876.
- 21 **Zheng Y, Gong X. 2019.** Niche differentiation rather than biogeography shapes the  
22 diversity and composition of microbiome of *Cycas panzhihuaensis*. *Microbiome*  
23 **7**: 152.

1

2

3

## FIGURES AND TABLES LEGENDS

4 FIG. 1. Map of Eastern North America with sampling localities of the 192 reindeer lichen  
5 specimens included in this study. Four species of *Cladonia* are represented by different  
6 symbols, red circles for *Cladonia mitis*, orange triangles for *C. rangiferina*, black square  
7 for *C. stellaris* and green stars for *C. stygia*. Bioclimatic domains highlighted following  
8 (Rowe, 1972).

9

10 FIG. 2. Majority-rule consensus tree of a Bayesian inference analysis from 126 ITS  
11 accessions of reindeer lichens. Branches in bold are supported by posterior probabilities  
12 ( $PP \geq 0.95$ ). Each color represents a species delimited by the multi-rate Poisson tree  
13 processes method (mPTP). Pictures show the four morphologically recognized species.

14

15 FIG. 3. Richness estimate values (number of observed amplicon sequence variants, ASVs)  
16 and alpha diversity indices (Shannon and Simpson) for reindeer lichens bacterial  
17 communities. A. Diversity values of reindeer lichens species delimited by the multi-rate  
18 Poisson tree processes method (mPTP) (host-species dataset). The species colors follow  
19 those of Fig. 2. B. Diversity values of *Cladonia stellaris* from lichen woodlands (LWs)  
20 northern and southern Quebec (LWs dataset). Asterisks indicate significant differences  
21 ( $p\text{-value} < 0.01$ ).

22

1 FIG. 4. Double Principal Coordinates Analysis (DPCoA) of bacterial community  
2 composition based on amplicon sequence variants (ASVs) (A) in reindeer lichens and,  
3 (B) in *Cladonia stellaris* from lichen woodlands (LWs) northern and southern Quebec.  
4 Bacterial communities are not grouped by host species. Two clusters are differentiated  
5 between northern and southern LWs (p-value < 0.01). The species colors in (A) follow  
6 those of Fig. 2.

7  
8 FIG. 5. Common core bacteriota of reindeer lichens at family as a function of the  
9 abundance threshold for (A) reindeer lichens, and for (B) *Cladonia stellaris*, with  
10 prevalence above 0.50. The x-axis represents the detection thresholds (indicates as  
11 relative abundance) from lower (left) to higher (right) abundance values. Color shading  
12 indicates the prevalence of each bacterial family among samples for each abundance  
13 threshold. As we increase the detection threshold, the prevalence decreases.

14  
15 FIG. S1. Markov chain Monte Carlo iterations from the Bayesian implementation of the  
16 PTP species delimitation methods (bPTP). Chain does not stay at high likelihood  
17 locations but oscillate from high to low locations indicating lack of convergence.

18  
19 FIG. S2. Relative abundance of the six most abundant bacteria phyla. Each horizontal bar  
20 represents a lichen sample and colors reflect different phyla. A. Reindeer lichens samples  
21 grouped by molecular species delimitation (multi-rate Poisson tree processes method,  
22 mPTP) (host-species dataset). B. *Cladonia stellaris* samples grouped by geography,  
23 lichen woodlands northern or southern Quebec (LWs dataset).

1

2 FIG. S3. Principal Coordinates analysis (PCoA) of bacterial community composition  
3 based on amplicon sequence variants (ASVs) (A) in reindeer lichens, and (B) in *Cladonia*  
4 *stellaris* from lichen woodlands (LWs) northern and southern Quebec. Bacterial  
5 communities are not grouped by host species. Two clusters are differentiated (p-value <  
6 0.01) between northern and southern LWs.

7

8 FIG. S4. The estimates of richness values (number of observed amplicon sequence  
9 variants, ASVs) and alpha diversity indices (Shannon and Simpson) for reindeer lichens  
10 bacterial communities. Species delimited by morphology (host-species dataset).

11

12 FIG. S5. Relative abundance of the bacteria associated with *Cladonia stellaris*. (A)  
13 Bacterial genera with significant (padj = 0.01) log<sub>2</sub> fold changes between lichen  
14 woodlands (LWs) northern (Kuujjuarapik) and southern (PNGJ) Quebec. “NA”  
15 corresponds to amplicon sequence variants (ASVs) whose genera could not be assigned.  
16 Each dot represents an ASV. (B) Comparison of bacteria relative abundance between  
17 LWs. Groups that significantly differ between Kuujjuarapik and PNGJ are shown, such  
18 as genera *Endobacter*, genera *Tundrisphaera*, family Caulobacteraceae and family  
19 Emeriobacterota.

20

21 FIG. S6. Venn diagram demonstrated the overlaps of the common core bacteriota of  
22 reindeer lichens and *Cladonia stellaris*.

23

1 TABLE S1. List of the 192 reindeer lichen specimens collected in Eastern North America  
2 and included in the study. The following information is provided for each sample:  
3 collection number, species name based on morphological delimitation, species named  
4 based on molecular delimitation (multi-rate Poisson tree processes method, mPTP),  
5 locality, vegetation zone, bioclimatic domain, altitude, type of genetic data generated and  
6 GenBank accession number. Data relative to the twenty-two specimens from GenBank  
7 are also provided.

8

9 TABLE S2. Sequencing reads identified among the 189 reindeer lichen specimens before  
10 and after quality trimming.

11

12 TABLE S3. Number of amplicon sequence variants (ASVs) for bacterial phyla detected in  
13 the two datasets (host-selectivity and LWs). Number of samples and names of reindeer  
14 lichen species considered for each dataset are included. Number of ASVs significant  
15 different in abundance is also provided.

16

17 TABLE S4. Amplicon sequence variants (ASVs) that significantly differ in relative  
18 abundance between (A) reindeer lichen species delimited by the multi-rate Poisson tree  
19 processes method (mPTP), (B) reindeer lichen species delimited by morphology, and (C)  
20 lichen woodlands (LWs) northern and southern Quebec. P-values and bacteria identity  
21 are provided for each ASV. The identity ( $\geq 95\%$ ) of each ASV according to Blast  
22 alignment to 16 rRNA sequences from NCBI database is also included with maximum  
23 and total score, query cover and E values.

1

2 TABLE S5. Bacteria amplicon sequence variants (ASVs) with prevalence higher than (A)  
3 0.50 and (B) 0.75 across our reindeer lichen samples (common core bacteriota). For each  
4 ASV, we provided phylum, class, order, family, and genus, as well as DNA sequence.  
5 The identity (>96%) of each ASV according to Blast alignment to 16 rRNA sequences  
6 from NCBI database is also included with maximum and total score, query cover and E  
7 values.

8

9 TABLE S6. Total common core abundance in each lichen sample as a sum of abundance of  
10 the common core members. A. Data for prevalence of 0.50. B. Data for prevalence of  
11 0.75.

12

13 TABLE S7. Bacterial amplicon sequence variants (ASVs) with prevalence higher than (A)  
14 0.50 and (B) 0.75 across our *Cladonia stellaris* samples (common core bacteriota). For  
15 each ASV, we provided Phylum, class, order, family, and genus, as well as DNA  
16 sequence. The identity (>96% and >97%) of each ASV according to Blast alignment to  
17 16 rRNA sequences from NCBI database is also included with maximum and total score,  
18 query cover and E values.

19

20 APPENDIX 01. FASTA alignment of 126 ITS sequences belonging to four species of  
21 reindeer lichens, such as *Cladonia mitis*, *C. rangiferina*, *C. stellaris* and *C. stygia*. Two  
22 individuals of *C. wainioi* are included as outgroup.

23

1 APPENDIX 02. Output file from the multi-rate PTP (mPTP) species delimitation method.  
2 Ten species are recognized with strongly supported values. *Cladonia mitis* was divided  
3 into four taxa; *C. stellaris* split into three; individuals belonging to *C. rangiferina* and *C.*  
4 *stygia* were merged together but split into two taxa, and two individuals of *C. wainioi*  
5 constituted the outgroup.

6  
7 APPENDIX 03. Statistical results of alpha-diversity in reindeer lichens for molecular and  
8 morphological-delimited species (host-selectivity dataset). Values estimated based on  
9 number of observed amplicon sequence variants (ASVs), Shannon and Simpson effective  
10 indices. Results derived from Shapiro-Wilk test of normality, Kruskal-Wallis non-  
11 parametric test and pairwise comparison with U-Mann-Whitney test are shown.

12  
13 APPENDIX 04. Statistical results of beta-diversity in reindeer lichens for molecular and  
14 morphological-delimited species (host-selectivity dataset). Significant differences  
15 estimated based on the UniFrac distance matrix. Results derived from PERMANOVA  
16 test Adonis and pairwise comparison (pairwise.adonis) are shown.

17  
18 APPENDIX 05. Statistical results of alpha-diversity in *Cladonia stellaris* from lichen  
19 woodlands northern and southern Quebec (LWs dataset). Values estimated based on  
20 number of observed amplicon sequence variants (ASVs), Shannon and Simpson effective  
21 indices. Results derived from Shapiro-Wilk test of normality, Kruskal-Wallis non-  
22 parametric test and pairwise comparison with U-Mann-Whitney test are shown.

23

1 APPENDIX 06. Statistical results of beta-diversity in *Cladonia stellaris* from lichen  
2 woodlands (LWs) northern and southern Quebec (LWs dataset). Significant differences  
3 estimated based on the UniFrac distance matrix. Results derived from PERMANOVA  
4 test Adonis and pairwise comparison (pairwise.adonis) are shown.

5

6 APPENDIX 07. Results derived from the Blast alignment to sequences in NCBI database  
7 16S ribosomal RNA. Amplicon sequence variants (ASVs) associated to *Cladonia*  
8 *stellaris* significantly different in abundance between northern and southern lichen  
9 woodlands were aligned. Sequence identity, maximal and total score, query cover, E  
10 values and percentage of identity are displayed.

11

12 APPENDIX 08. Results derived from the Blast alignment to sequences in NCBI database  
13 16S ribosomal RNA. Amplicon sequence variants (ASVs) included in the common core  
14 bacteriota (prevalence 0.50) of reindeer lichens were aligned. Sequence identity, maximal  
15 and total score, query cover, E values and percentage of identity are displayed.

16

17 APPENDIX 09. Results derived from the Blast alignment to sequences in NCBI database  
18 16S ribosomal RNA. Amplicon sequence variants (ASVs) included in the common core  
19 bacteriota (prevalence 0.50) of *Cladonia stellaris* were aligned. Sequence identity,  
20 maximal and total score, query cover, E values and percentage of identity are displayed.

21



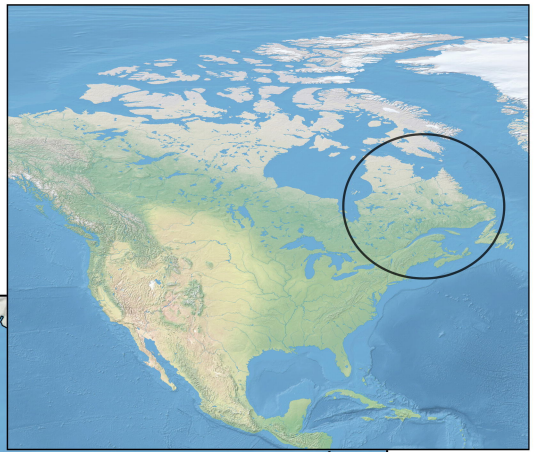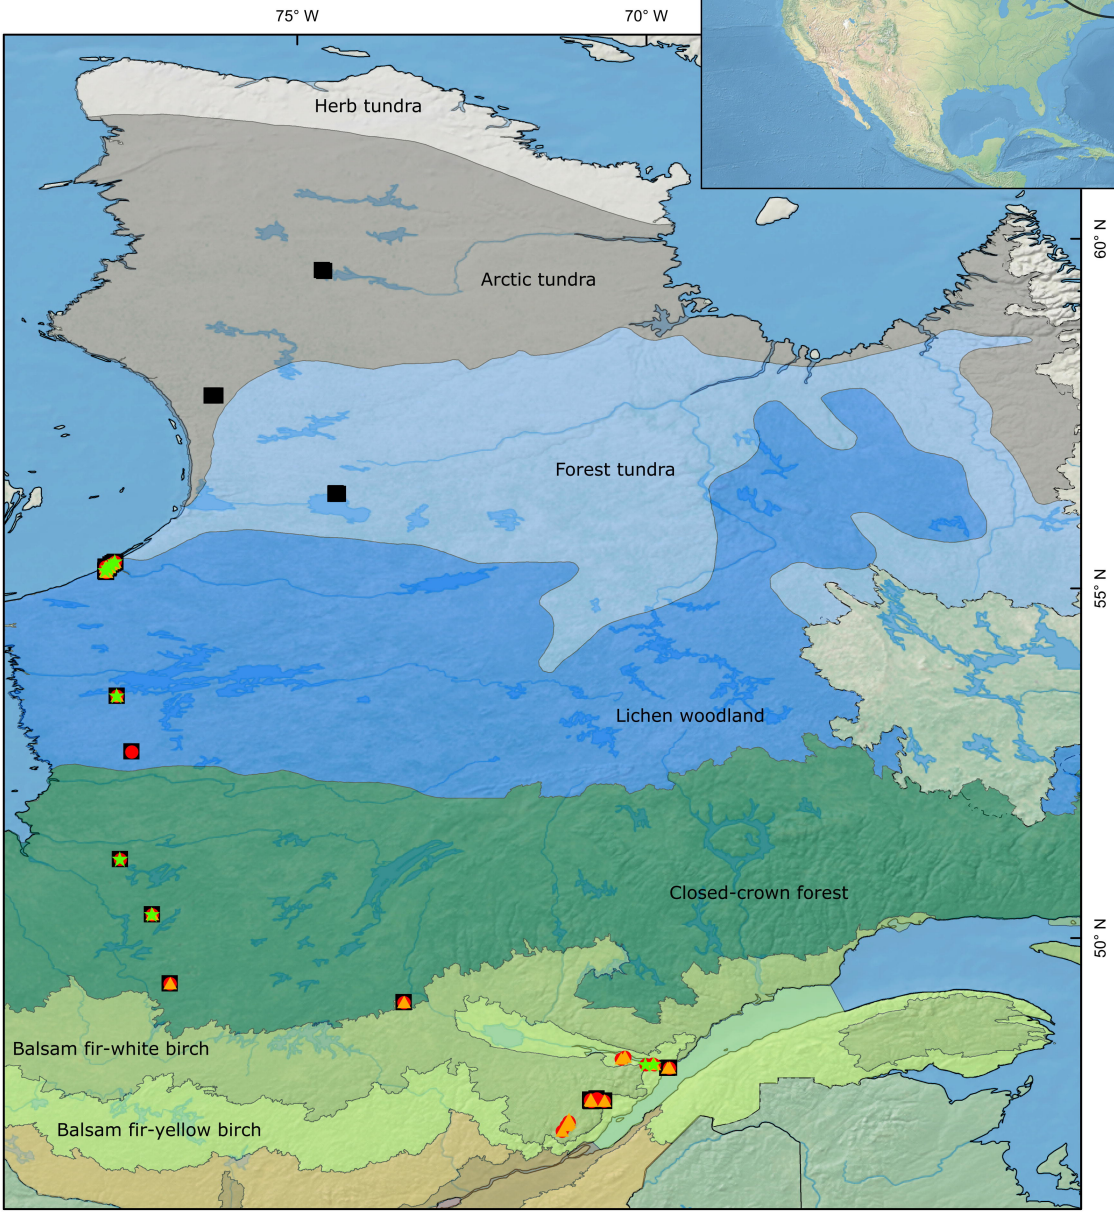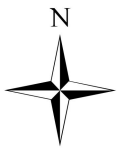

|                                            |                           |                             |
|--------------------------------------------|---------------------------|-----------------------------|
| ★ <i>Cladonia stygia</i> (13 samples)      | ■ Lichen woodland         | ■ Herb tundra               |
| ▲ <i>Cladonia rangiferina</i> (41 samples) | ■ Closed-crown forest     | ■ Forest tundra             |
| ● <i>Cladonia mitis</i> (53 samples)       | ■ Balsam fir-white birch  | ■ Sugar maple-yellow birch  |
| ■ <i>Cladonia stellaris</i> (83 samples)   | ■ Balsam fir-yellow birch | ■ Maple forest with hickory |
| <b>Vegetation zone</b>                     | ■ Arctic tundra           | ■ Maple forest with lime    |

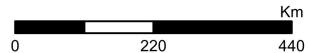

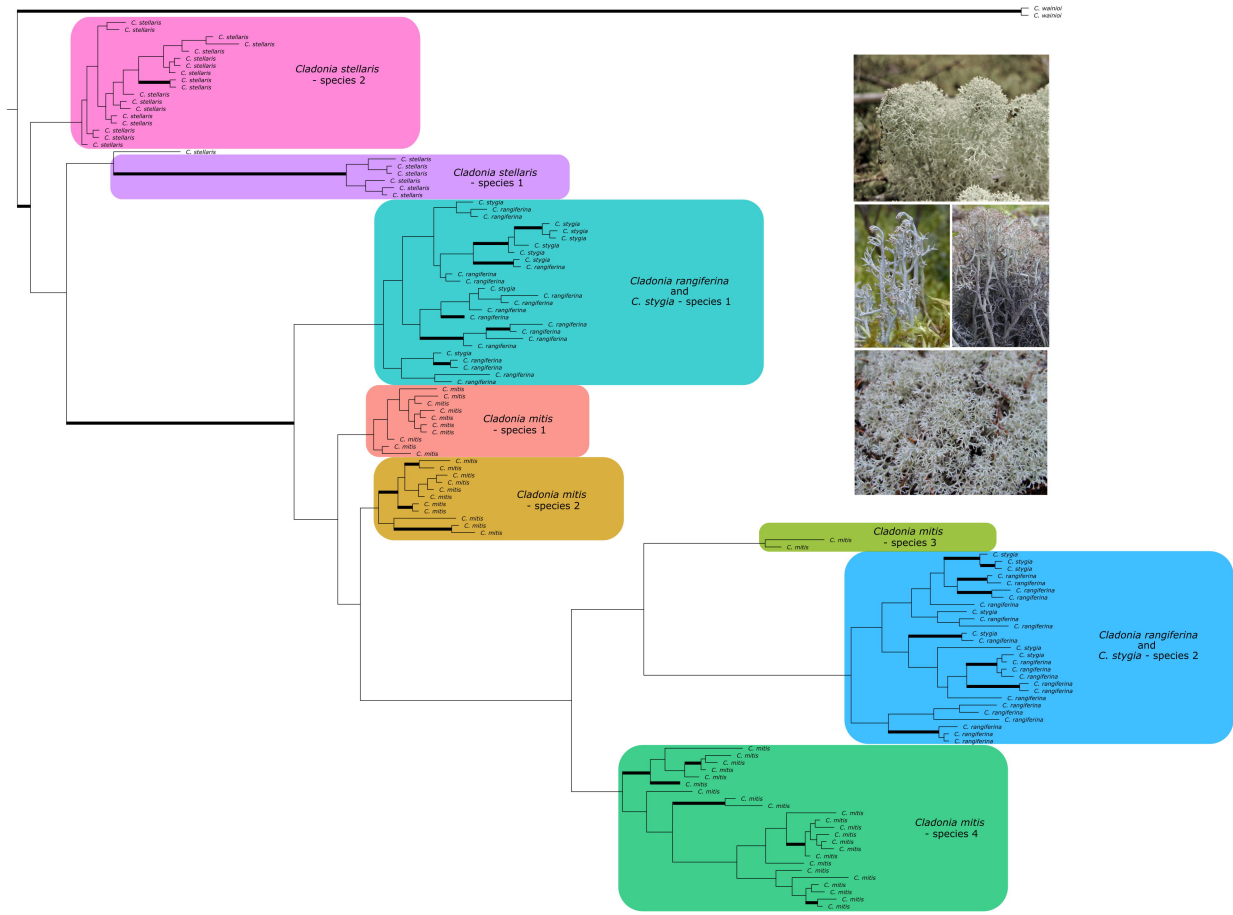

### A. Bacterial richness and diversity in reindeer lichens species

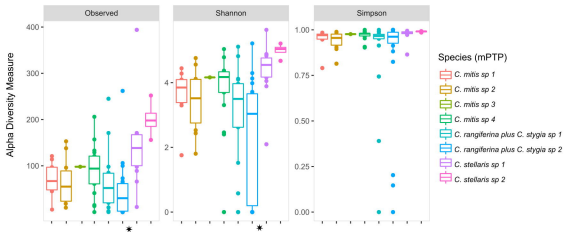

### B. Bacterial richness and diversity in *Cladonia stellaris* from LWs northern and southern Quebec

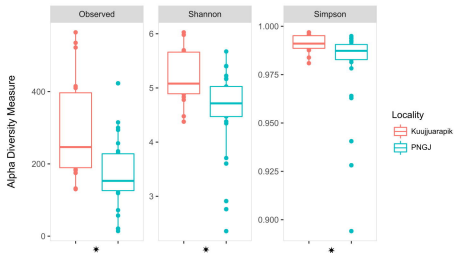

**A. DPCoA of bacterial community composition in reindeer lichens species**

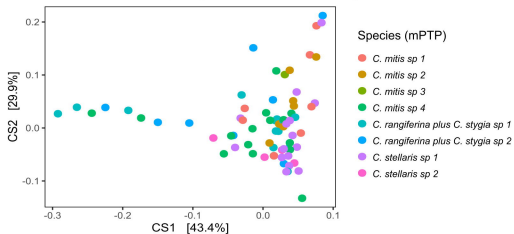

**B. DPCoA of bacterial community composition in *Cladonia stellaris* from LWs northern and southern Quebec**

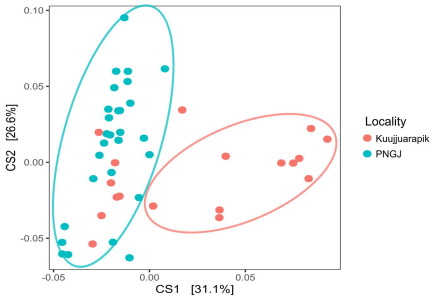

A. Heatmap of the common core microbiota of reindeer lichens at family level

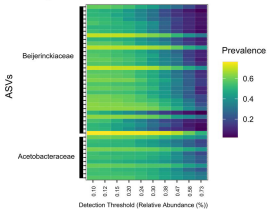

B. Heatmap of the common core microbiota of *Cladonia stellaris* at family level

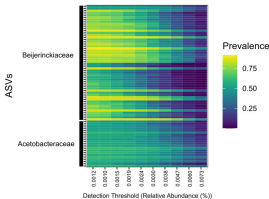

Source: https://www.biorxiv.org/content/10.1101/2021.01.30.428927v1.full.pdf
